# Supplementary material for: Rapid crystallization of l-arginine acetate on engineered surfaces using metal-assisted and microwave-accelerated evaporative crystallization
Source: Royal Society of Chemistry journal article supplement (doi:10.1039/c2ce25380a), 2012-01-01
Supplement: c2ce25380a.pdf [file c2ce25380a.pdf]

## Electronic Supplementary Information (ESI)

for

### Rapid Crystallization of L-Arginine Acetate on Engineered Surfaces using Metal-Assisted and Microwave-Accelerated Evaporative Crystallization

Melissa A. Pinard<sup>‡</sup> Tsehai A. J. Grell, Danielle Pettis, Muzaffer Mohammed, and  
Kadir Aslan\*

Morgan State University, Department of Chemistry, 1700 East Cold Spring Lane, Baltimore,  
MD 21251 USA

<sup>‡</sup> Current Address: University of Florida, Department of Biochemistry and Molecular Biology,  
1600 SW Archer Road, Gainesville, FL 32610, USA

\*Corresponding Author: [kadir.aslan@morgan.edu](mailto:kadir.aslan@morgan.edu)

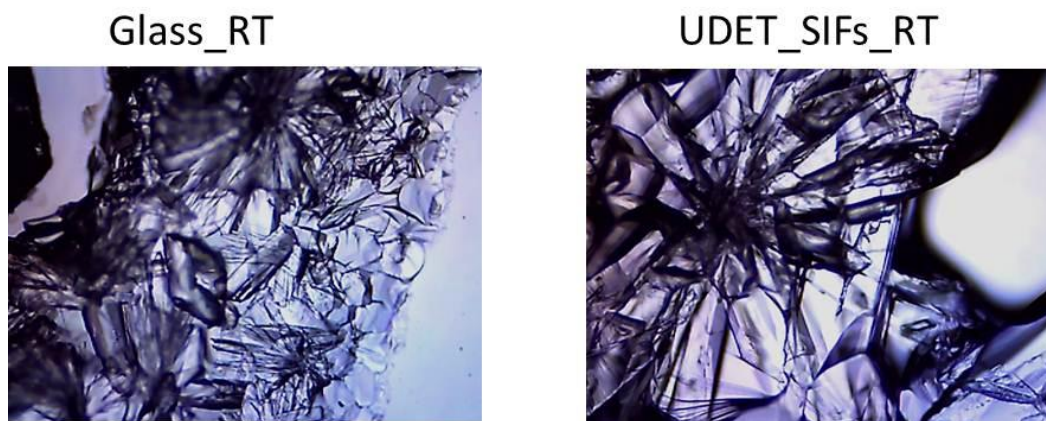

**Figure S1.** Optical microscope images of L-arginine acetate crystallized on blank glass slides and UDET-modified SIFs at room temperature (RT).

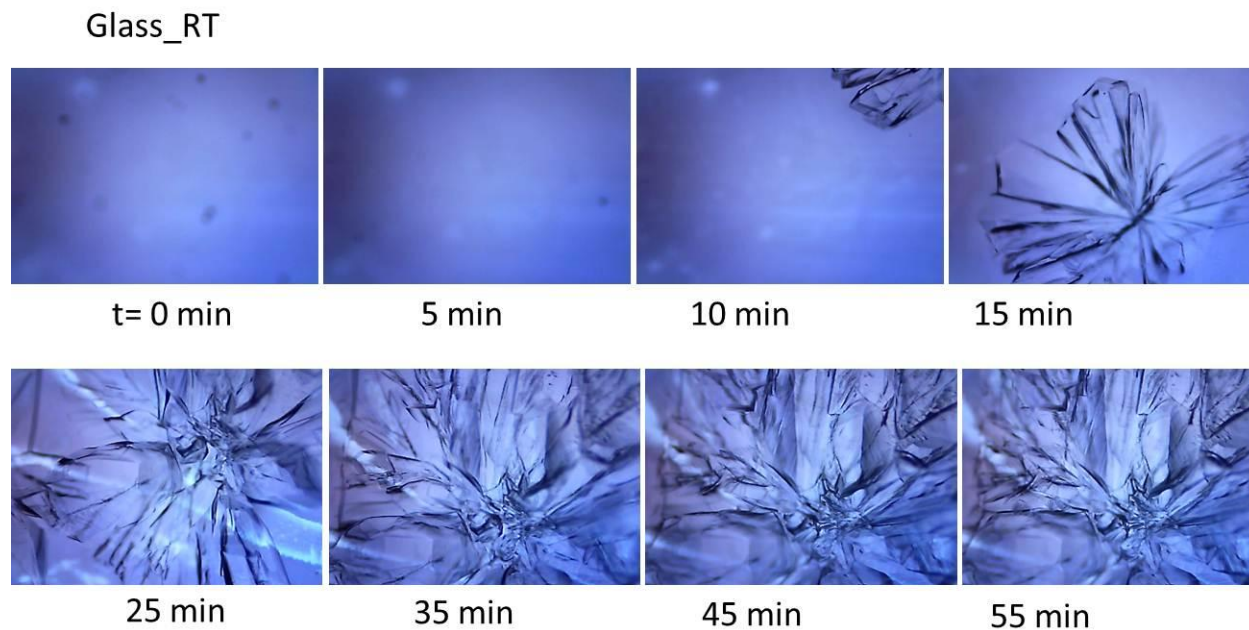

**Figure S2.** Timed images of L-arginine acetate crystallized on blank SIFs at room temperature.

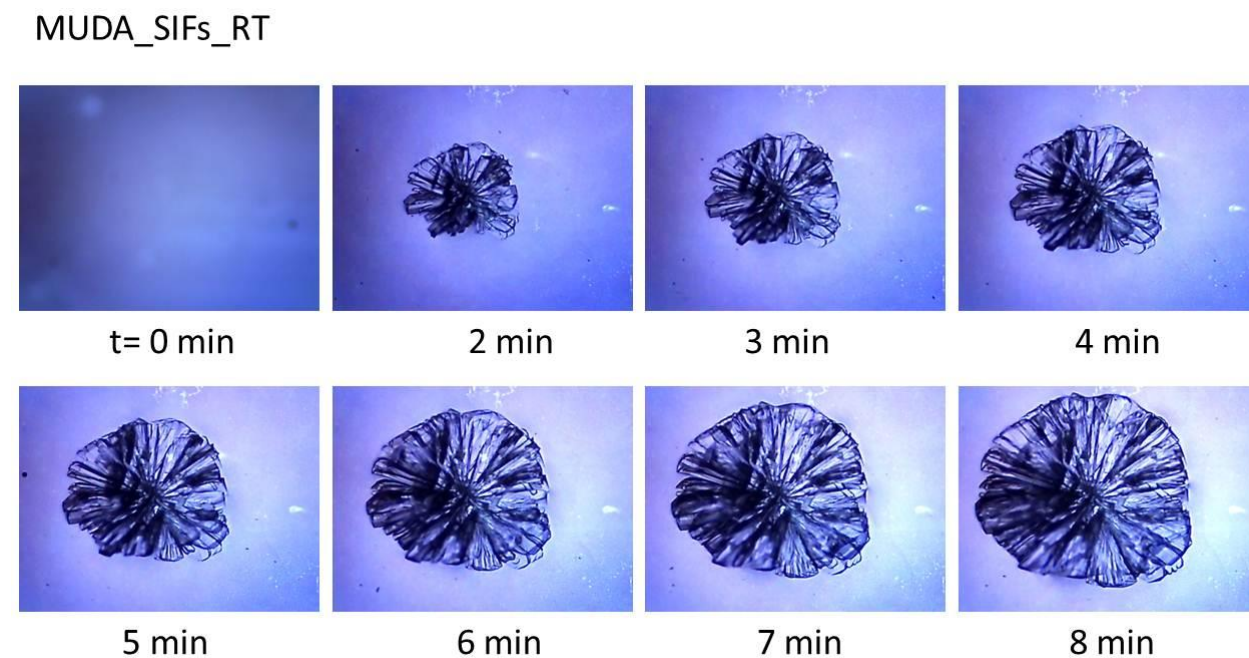

**Figure S3.** Timed images of L-arginine acetate crystallized on MUDA-modified SIFs at room temperature.
